# Supplementary material
Source: PubMed Central journal article supplement (PMC8050434)
Supplement: 2852_figure.pdf [file 2852_figure.pdf]

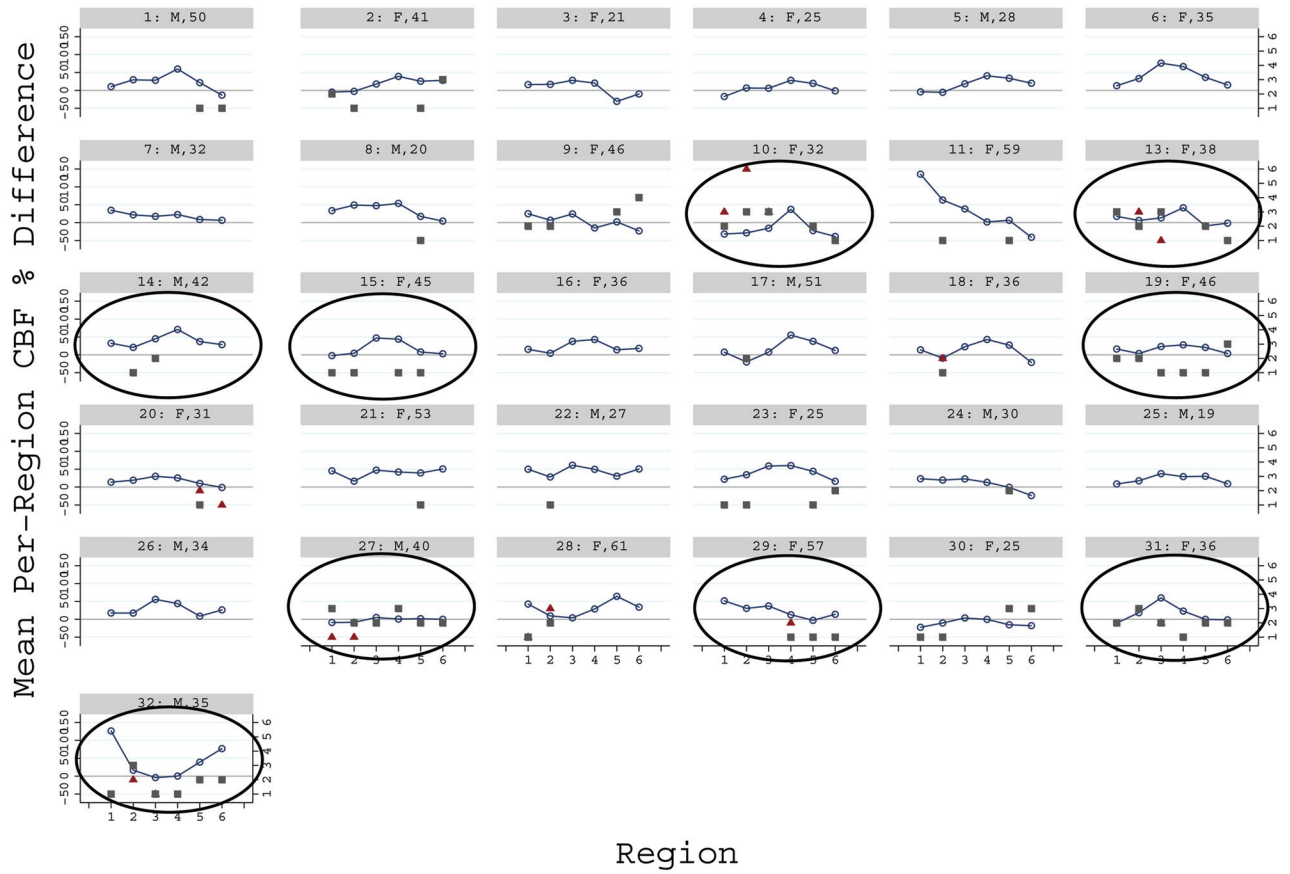

Graphs by Patient

## Region

**On-line Fig 1.** All patients with posterior parieto-occipital WMD (unconnected squares) or cortical strokes (unconnected red triangles) in regions 3 and 4 also have disease in the anterior frontotemporal lobes represented by regions 1, 2, 5, and 6, as shown in circled patients.
